# Supplementary material
Source: Elsevier journal article supplement (https://www.sciencedirect.com/science/article/pii/S2173505013000046)
Supplement: mmc1 [file S2173505013000046:mmc1.pdf]

ANEXO 1: Escala de Pensamientos y Conductas Autolesivas (EPCA)

Ideación suicida

|    |                                                                                              |                     |    |                     |  |  |  |  |  |  |  |   |  |  |
|----|----------------------------------------------------------------------------------------------|---------------------|----|---------------------|--|--|--|--|--|--|--|---|--|--|
| 1. | ¿Alguna vez has pensado en matarte?                                                          | 0) no               |    |                     |  |  |  |  |  |  |  | O |  |  |
|    |                                                                                              | 1) sí               |    |                     |  |  |  |  |  |  |  | O |  |  |
| 2. | ¿Cuántos años tenías la primera vez que tuviste estos pensamientos?<br>(Edad)                | 0 1 2 3 4 5 6 7 8 9 |    |                     |  |  |  |  |  |  |  |   |  |  |
|    |                                                                                              | 0 1 2 3 4 5 6 7 8 9 |    |                     |  |  |  |  |  |  |  |   |  |  |
| 3. | ¿Cuántos años tenías la última vez?<br>(Edad)                                                | 0 1 2 3 4 5 6 7 8 9 |    |                     |  |  |  |  |  |  |  |   |  |  |
|    |                                                                                              | 0 1 2 3 4 5 6 7 8 9 |    |                     |  |  |  |  |  |  |  |   |  |  |
| 4. | ¿Cuántas veces en tu vida has tenido este tipo de pensamientos?<br><br>(Episodios separados) | 0 1 2 3 4 5 6 7 8 9 |    |                     |  |  |  |  |  |  |  |   |  |  |
|    |                                                                                              | 0 1 2 3 4 5 6 7 8 9 |    |                     |  |  |  |  |  |  |  |   |  |  |
| 5. | ¿Cuántas veces en el pasado año?                                                             | 0 1 2 3 4 5 6 7 8 9 |    |                     |  |  |  |  |  |  |  |   |  |  |
|    |                                                                                              | 0 1 2 3 4 5 6 7 8 9 |    |                     |  |  |  |  |  |  |  |   |  |  |
| 6. | ¿Cuántas veces en el pasado mes?                                                             | 0 1 2 3 4 5 6 7 8 9 |    |                     |  |  |  |  |  |  |  |   |  |  |
|    |                                                                                              | 0 1 2 3 4 5 6 7 8 9 |    |                     |  |  |  |  |  |  |  |   |  |  |
| 7. | ¿Cuántas veces en la pasada semana?                                                          | 0 1 2 3 4 5 6 7 8 9 |    |                     |  |  |  |  |  |  |  |   |  |  |
|    |                                                                                              | 0 1 2 3 4 5 6 7 8 9 |    |                     |  |  |  |  |  |  |  |   |  |  |
| 8. | ¿Cuándo fue la última vez? Fecha                                                             | Día                 | D  | 0 1 2 3 4 5 6 7 8 9 |  |  |  |  |  |  |  |   |  |  |
|    |                                                                                              |                     | D' | 0 1 2 3 4 5 6 7 8 9 |  |  |  |  |  |  |  |   |  |  |
|    |                                                                                              | Mes                 | M  | 0 1 2 3 4 5 6 7 8 9 |  |  |  |  |  |  |  |   |  |  |
|    |                                                                                              |                     | M' | 0 1 2 3 4 5 6 7 8 9 |  |  |  |  |  |  |  |   |  |  |
|    |                                                                                              | Año                 | A  | 0 1 2 3 4 5 6 7 8 9 |  |  |  |  |  |  |  |   |  |  |
|    |                                                                                              |                     | A' | 0 1 2 3 4 5 6 7 8 9 |  |  |  |  |  |  |  |   |  |  |

|     |                                                                                           |                                |      |   |   |   |   |   |   |   |   |   |   |
|-----|-------------------------------------------------------------------------------------------|--------------------------------|------|---|---|---|---|---|---|---|---|---|---|
|     |                                                                                           |                                | A''  | 0 | 1 | 2 | 3 | 4 | 5 | 6 | 7 | 8 | 9 |
|     |                                                                                           |                                | A''' | 0 | 1 | 2 | 3 | 4 | 5 | 6 | 7 | 8 | 9 |
| 9.  | En una escala de 0 a 4, en el peor momento, ¿cuál era la intensidad de esos pensamientos? | 0   1   2   3   4              |      |   |   |   |   |   |   |   |   |   |   |
| 10. | Por término medio, en una escala de 0 a 4, ¿cómo de intensos fueron tus pensamientos?     | 0   1   2   3   4              |      |   |   |   |   |   |   |   |   |   |   |
| 11. | Cuando tuviste ese tipo de pensamientos, ¿en qué método pensaste?                         | 1. Sobreingesta medicamentosa  | ○    |   |   |   |   |   |   |   |   |   |   |
|     |                                                                                           | 2. Drogras ilegales            | ○    |   |   |   |   |   |   |   |   |   |   |
|     |                                                                                           | 3. Medicación sin receta       | ○    |   |   |   |   |   |   |   |   |   |   |
|     |                                                                                           | 4. Veneno                      | ○    |   |   |   |   |   |   |   |   |   |   |
|     |                                                                                           | 5. Armas de fuego              | ○    |   |   |   |   |   |   |   |   |   |   |
|     |                                                                                           | 6. Inmolación                  | ○    |   |   |   |   |   |   |   |   |   |   |
|     |                                                                                           | 7. Ahorcamiento                | ○    |   |   |   |   |   |   |   |   |   |   |
|     |                                                                                           | 8. Objeto afilado              | ○    |   |   |   |   |   |   |   |   |   |   |
|     |                                                                                           | 9. Gas del tubo de escape      | ○    |   |   |   |   |   |   |   |   |   |   |
|     |                                                                                           | 10. Otros gases                | ○    |   |   |   |   |   |   |   |   |   |   |
|     |                                                                                           | 11. Tren/Coche                 | ○    |   |   |   |   |   |   |   |   |   |   |
|     |                                                                                           | 12. Saltar desde un lugar alto | ○    |   |   |   |   |   |   |   |   |   |   |
|     |                                                                                           | 13. Ahogarse                   | ○    |   |   |   |   |   |   |   |   |   |   |
|     |                                                                                           | 14. Asfixia                    | ○    |   |   |   |   |   |   |   |   |   |   |
|     |                                                                                           | 15. Otras drogras con receta   | ○    |   |   |   |   |   |   |   |   |   |   |
|     |                                                                                           | 16. Otro _____                 | ○    |   |   |   |   |   |   |   |   |   |   |
|     |                                                                                           | 17. Varios Métodos             | ○    |   |   |   |   |   |   |   |   |   |   |
|     |                                                                                           | 88. No aplicable               | ○    |   |   |   |   |   |   |   |   |   |   |
|     |                                                                                           | 99. Desconocido                | ○    |   |   |   |   |   |   |   |   |   |   |

|            |                                                                                                                   |                                            |
|------------|-------------------------------------------------------------------------------------------------------------------|--------------------------------------------|
| <b>12.</b> | ¿Por qué crees que pensaste en matarte?                                                                           |                                            |
| <b>13.</b> | En una escala de 0 a 4, ¿en qué medida pensaste en matarte para deshacerte de los malos sentimientos?             | 0 1 2 3 4                                  |
| <b>14.</b> | ¿En qué medida pensaste en suicidarte para sentir algo, porque te sentías entumecido o vacío?                     | 0 1 2 3 4                                  |
| <b>15.</b> | ¿En qué medida pensaste en suicidarte para comunicarte con otra persona o conseguir su atención?                  | 0 1 2 3 4                                  |
| <b>16.</b> | ¿En qué medida pensaste en suicidarte para evitar hacer algo o escapar de algo o alguien?                         | 0 1 2 3 4                                  |
| <b>17.</b> | En una escala de 0 a 4, ¿en qué medida los problemas con tu familia te llevaron a tener pensamientos de suicidio? | 0 1 2 3 4                                  |
| <b>18.</b> | ¿En qué medida los problemas con tus amigos te llevaron a tener estos pensamientos?                               | 0 1 2 3 4                                  |
| <b>19.</b> | ¿En qué medida los problemas con tu pareja te llevaron a tener estos pensamientos?                                | 0 1 2 3 4                                  |
| <b>20.</b> | ¿En qué medida los problemas con tus compañeros te llevaron a tener este tipo de pensamientos?                    | 0 1 2 3 4                                  |
| <b>21.</b> | ¿En qué medida los problemas en el trabajo o los estudios te llevaron a tener este tipo de pensamientos?          | 0 1 2 3 4                                  |
| <b>22.</b> | ¿En qué medida tu estado mental te llevó a tener este tipo de pensamientos?                                       | 0 1 2 3 4                                  |
| <b>23.</b> | ¿Durante qué porcentaje de tiempo (%) tomaste drogas o alcohol cuando tuviste este tipo de pensamientos?          | 0 1 2 3 4 5 6 7 8 9<br>0 1 2 3 4 5 6 7 8 9 |

|            |                                                                                                                                                              | 0                                                | 1                     | 2 | 3 | 4 | 5 | 6 | 7 | 8 | 9 |  |
|------------|--------------------------------------------------------------------------------------------------------------------------------------------------------------|--------------------------------------------------|-----------------------|---|---|---|---|---|---|---|---|--|
| <b>24.</b> | Cuando tuviste pensamientos de suicidio, ¿cuánto tiempo solían durar?                                                                                        | 1. 0 segundos                                    | <input type="radio"/> |   |   |   |   |   |   |   |   |  |
|            |                                                                                                                                                              | 2. 1-60 segundos                                 | <input type="radio"/> |   |   |   |   |   |   |   |   |  |
|            |                                                                                                                                                              | 3. 2-15 minutos                                  | <input type="radio"/> |   |   |   |   |   |   |   |   |  |
|            |                                                                                                                                                              | 4. 16-60 minutos                                 | <input type="radio"/> |   |   |   |   |   |   |   |   |  |
|            |                                                                                                                                                              | 5. menos de un día                               | <input type="radio"/> |   |   |   |   |   |   |   |   |  |
|            |                                                                                                                                                              | 6. 1-2 días                                      | <input type="radio"/> |   |   |   |   |   |   |   |   |  |
|            |                                                                                                                                                              | 7. más de dos días o                             | <input type="radio"/> |   |   |   |   |   |   |   |   |  |
|            |                                                                                                                                                              | 8. amplios periodos (abarca más de 2 respuestas) | <input type="radio"/> |   |   |   |   |   |   |   |   |  |
|            |                                                                                                                                                              | 88. no aplicable                                 | <input type="radio"/> |   |   |   |   |   |   |   |   |  |
|            |                                                                                                                                                              | 99. desconocido                                  | <input type="radio"/> |   |   |   |   |   |   |   |   |  |
| <b>25.</b> | Antes de que tuvieras este tipo de pensamientos, ¿cuántos amigos tuyos, que tú sepas, habían pensado en matarse?                                             | 0                                                | 1                     | 2 | 3 | 4 | 5 | 6 | 7 | 8 | 9 |  |
|            |                                                                                                                                                              | 0                                                | 1                     | 2 | 3 | 4 | 5 | 6 | 7 | 8 | 9 |  |
| <b>26.</b> | Desde la primera vez que pensaste en suicidarte, ¿cuántos amigos tuyos han pensado en matarse?                                                               | 0                                                | 1                     | 2 | 3 | 4 | 5 | 6 | 7 | 8 | 9 |  |
|            |                                                                                                                                                              | 0                                                | 1                     | 2 | 3 | 4 | 5 | 6 | 7 | 8 | 9 |  |
| <b>27.</b> | Antes de que pensaras en el suicidio, ¿en qué medida el hecho de que tus amigos pensarán en matarse influyó en tus pensamientos de suicidio?                 | 0 1 2 3 4                                        |                       |   |   |   |   |   |   |   |   |  |
| <b>28.</b> | Desde que empezaste a tener pensamientos de suicidio, ¿en qué medida el hecho de que tus amigos pensarán en matarse influyó en tus pensamientos de suicidio? | 0 1 2 3 4                                        |                       |   |   |   |   |   |   |   |   |  |
| <b>29.</b> | En una escala de 0 a 4, ¿cuál es la probabilidad de que tengas pensamientos de suicidio en el futuro?                                                        | 0 1 2 3 4                                        |                       |   |   |   |   |   |   |   |   |  |

# Planes de suicidio

|     |                                                                                                           |                               |                       |
|-----|-----------------------------------------------------------------------------------------------------------|-------------------------------|-----------------------|
| 30. | ¿Alguna vez has hecho un plan para suicidarte? pensado en matarte?                                        | 0) no                         | <input type="radio"/> |
|     |                                                                                                           | 1) sí                         | <input type="radio"/> |
| 31. | ¿Cuántos años tenías la primera vez que hiciste uno de estos planes?<br>(Edad)                            | 0 1 2 3 4 5 6 7 8 9           |                       |
|     |                                                                                                           | 0 1 2 3 4 5 6 7 8 9           |                       |
| 32. | ¿Cuántos años tenías la última vez?<br>(Edad)                                                             | 0 1 2 3 4 5 6 7 8 9           |                       |
|     |                                                                                                           | 0 1 2 3 4 5 6 7 8 9           |                       |
| 33. | ¿Cuántas veces en tu vida has hecho este tipo de planes? (Episodios separados)                            | 0 1 2 3 4 5 6 7 8 9           |                       |
|     |                                                                                                           | 0 1 2 3 4 5 6 7 8 9           |                       |
| 34. | ¿Cuántas veces fueron en el pasado año?                                                                   | 0 1 2 3 4 5 6 7 8 9           |                       |
|     |                                                                                                           | 0 1 2 3 4 5 6 7 8 9           |                       |
| 35. | ¿Cuántas veces en el pasado mes?                                                                          | 0 1 2 3 4 5 6 7 8 9           |                       |
|     |                                                                                                           | 0 1 2 3 4 5 6 7 8 9           |                       |
| 36. | ¿Cuántas veces en la pasada semana?                                                                       | 0 1 2 3 4 5 6 7 8 9           |                       |
|     |                                                                                                           | 0 1 2 3 4 5 6 7 8 9           |                       |
| 37. | En una escala de 0 a 4, en el peor momento, ¿hasta qué punto consideraste en serio llevar a cabo tu plan? | 0 1 2 3 4                     |                       |
| 38. | Por término medio, en una escala de 0 a 4, ¿hasta qué punto consideraste en serio llevar a cabo tu plan?  | 0 1 2 3 4                     |                       |
| 39. | ¿Qué método planeaste utilizar?                                                                           | 1. Sobreingesta medicamentosa | <input type="radio"/> |
|     |                                                                                                           | 2. Drogas ilegales            | <input type="radio"/> |
|     |                                                                                                           | 3. Medicación sin receta      | <input type="radio"/> |

|     |                                                                                                  |                                |                       |
|-----|--------------------------------------------------------------------------------------------------|--------------------------------|-----------------------|
|     |                                                                                                  | 4. Veneno                      | <input type="radio"/> |
|     |                                                                                                  | 5. Armas de fuego              | <input type="radio"/> |
|     |                                                                                                  | 6. Inmolación                  | <input type="radio"/> |
|     |                                                                                                  | 7. Ahorcamiento                | <input type="radio"/> |
|     |                                                                                                  | 8. Objeto afilado              | <input type="radio"/> |
|     |                                                                                                  | 9. Gas del tubo de escape      | <input type="radio"/> |
|     |                                                                                                  | 10. Otros gases                | <input type="radio"/> |
|     |                                                                                                  | 11. Tren/Coche                 | <input type="radio"/> |
|     |                                                                                                  | 12. Saltar desde un lugar alto | <input type="radio"/> |
|     |                                                                                                  | 13. Ahogarse                   | <input type="radio"/> |
|     |                                                                                                  | 14. Asfixia                    | <input type="radio"/> |
|     |                                                                                                  | 15. Otras drogas con receta    | <input type="radio"/> |
|     |                                                                                                  | 16. Otro _____                 | <input type="radio"/> |
|     |                                                                                                  | 17. Varios Métodos             | <input type="radio"/> |
|     |                                                                                                  | 88. No aplicable               | <input type="radio"/> |
|     |                                                                                                  | 99. Desconocido                | <input type="radio"/> |
| 40. | ¿Por qué piensas que haces planes de suicidio?                                                   |                                |                       |
| 41. | En una escala de 0 a 4, ¿en qué medida lo hiciste para deshacerte de tus sentimientos negativos? | 0   1   2   3   4              |                       |
| 42. | ¿En qué medida lo hiciste para sentir algo, porque te sentías entumecido o vacío?                | 0   1   2   3   4              |                       |
| 43. | ¿En qué medida lo hiciste para comunicarte con alguien o conseguir su atención?                  | 0   1   2   3   4              |                       |
| 44. | ¿En qué medida lo hiciste para evadir algo o escapar de algo o alguien?                          | 0   1   2   3   4              |                       |
| 45. | En una escala de 0 a 4, ¿en qué medida los problemas con tu familia                              | 0   1   2   3   4              |                       |

|            |                                                                                                                  |                                                  |  |  |  |  |  |  |  |                       |  |
|------------|------------------------------------------------------------------------------------------------------------------|--------------------------------------------------|--|--|--|--|--|--|--|-----------------------|--|
|            | te llevaron a hacer planes de suicidio?                                                                          |                                                  |  |  |  |  |  |  |  |                       |  |
| <b>46.</b> | ¿En qué medida los problemas con tus amigos te llevaron a hacer planes de suicidio?                              | 0 1 2 3 4                                        |  |  |  |  |  |  |  |                       |  |
| <b>47.</b> | ¿En qué medida los problemas con tu pareja te llevaron a hacer planes de suicidio?                               | 0 1 2 3 4                                        |  |  |  |  |  |  |  |                       |  |
| <b>48.</b> | ¿En qué medida los problemas con tus compañeros te llevaron a hacer planes de suicidio?                          | 0 1 2 3 4                                        |  |  |  |  |  |  |  |                       |  |
| <b>49.</b> | ¿En qué medida los problemas en el trabajo o los estudios te llevaron a hacer planes de suicidio?                | 0 1 2 3 4                                        |  |  |  |  |  |  |  |                       |  |
| <b>50.</b> | ¿En qué medida tu estado mental te llevó a hacer planes de suicidio?                                             | 0 1 2 3 4                                        |  |  |  |  |  |  |  |                       |  |
| <b>51</b>  | ¿Durante cuánto tiempo (%) tomaste drogas o alcohol cuando planeaste suicidarte?                                 | 0 1 2 3 4 5 6 7 8 9                              |  |  |  |  |  |  |  |                       |  |
|            |                                                                                                                  | 0 1 2 3 4 5 6 7 8 9                              |  |  |  |  |  |  |  |                       |  |
|            |                                                                                                                  | 0 1 2 3 4 5 6 7 8 9                              |  |  |  |  |  |  |  |                       |  |
| <b>52.</b> | ¿Durante cuánto tiempo pensaste en el plan antes de decidir seguir adelante con tu vida o llevarlo a cabo?       | 1. 0 segundos                                    |  |  |  |  |  |  |  | <input type="radio"/> |  |
|            |                                                                                                                  | 2. 1-60 segundos                                 |  |  |  |  |  |  |  | <input type="radio"/> |  |
|            |                                                                                                                  | 3. 2-15 minutos                                  |  |  |  |  |  |  |  | <input type="radio"/> |  |
|            |                                                                                                                  | 4. 16-60 minutos                                 |  |  |  |  |  |  |  | <input type="radio"/> |  |
|            |                                                                                                                  | 5. menos de un día                               |  |  |  |  |  |  |  | <input type="radio"/> |  |
|            |                                                                                                                  | 6. 1-2 días                                      |  |  |  |  |  |  |  | <input type="radio"/> |  |
|            |                                                                                                                  | 7. más de dos días o                             |  |  |  |  |  |  |  | <input type="radio"/> |  |
|            |                                                                                                                  | 8. amplios periodos (abarca más de 2 respuestas) |  |  |  |  |  |  |  | <input type="radio"/> |  |
|            |                                                                                                                  | 88. no aplicable                                 |  |  |  |  |  |  |  | <input type="radio"/> |  |
|            |                                                                                                                  | 99. desconocido                                  |  |  |  |  |  |  |  | <input type="radio"/> |  |
| <b>53.</b> | Antes de que hicieras un plan de suicidio, ¿cuántos amigos tuyos, que tú sepas, habían hecho planes de suicidio? | 0 1 2 3 4 5 6 7 8 9                              |  |  |  |  |  |  |  |                       |  |
|            |                                                                                                                  | 0 1 2 3 4 5 6 7 8 9                              |  |  |  |  |  |  |  |                       |  |

|     |                                                                                                                                        |                                                               |
|-----|----------------------------------------------------------------------------------------------------------------------------------------|---------------------------------------------------------------|
| 54. | Desde la primera vez que planeaste suicidarte, ¿cuántos amigos tuyos han hecho planes de suicidio?                                     | <div>0 1 2 3 4 5 6 7 8 9</div> <div>0 1 2 3 4 5 6 7 8 9</div> |
| 55. | Antes de que hicieras un plan de suicidio, ¿en qué medida influyó en ti el hecho de que tus amigos hicieran planes de suicidio?        | <div>0 1 2 3 4</div>                                          |
| 56. | Desde la primera vez que planeaste suicidarte, ¿en qué medida influyó en ti el hecho de que tus amigos hayan hecho planes de suicidio? | <div>0 1 2 3 4</div>                                          |

## Gestos suicidas

|     |                                                                                           |                      |
|-----|-------------------------------------------------------------------------------------------|----------------------|
| 57. | En una escala de 0 a 4, ¿cuál es la probabilidad de que planees tu suicidio en el futuro? | <div>0 1 2 3 4</div> |
|-----|-------------------------------------------------------------------------------------------|----------------------|

|     |                                                                                                                           |       |                       |
|-----|---------------------------------------------------------------------------------------------------------------------------|-------|-----------------------|
| 58. | Alguna vez ha hecho algo para que alguien creyera que tú querías matarte cuando realmente no tenías intención de hacerlo? | 0) no | <input type="radio"/> |
|     |                                                                                                                           | 1) sí | <input type="radio"/> |

Sólo rellenar si **NO** ha habido intención suicida y solo querían que alguien CREYESE que querían intentar suicidarse.

Llamaremos a este tipo de actos "gesto suicida".

|     |                                                                           |                                                               |
|-----|---------------------------------------------------------------------------|---------------------------------------------------------------|
| 59. | ¿Cuántos años tenías la primera vez que hiciste algo así? ( <i>edad</i> ) | <div>0 1 2 3 4 5 6 7 8 9</div> <div>0 1 2 3 4 5 6 7 8 9</div> |
| 60. | ¿Cuántos años tenías la última vez que lo hiciste? ( <i>edad</i> )        | <div>0 1 2 3 4 5 6 7 8 9</div> <div>0 1 2 3 4 5 6 7 8 9</div> |
| 61. | ¿Cuántas veces en tu vida has hecho un gesto suicida?                     | <div>0 1 2 3 4 5 6 7 8 9</div> <div>0 1 2 3 4 5 6 7 8 9</div> |
| 62. | ¿Cuántos fueron el pasado año?                                            | <div>0 1 2 3 4 5 6 7 8 9</div> <div>0 1 2 3 4 5 6 7 8 9</div> |



|            |                                                                                                                                   |                                            |
|------------|-----------------------------------------------------------------------------------------------------------------------------------|--------------------------------------------|
| <b>63.</b> | ¿Cuántos fueron el pasado mes?                                                                                                    | 0 1 2 3 4 5 6 7 8 9<br>0 1 2 3 4 5 6 7 8 9 |
| <b>64.</b> | ¿Cuántos fueron la semana pasada?                                                                                                 | 0 1 2 3 4 5 6 7 8 9<br>0 1 2 3 4 5 6 7 8 9 |
| <b>65.</b> | ¿Qué hiciste?                                                                                                                     |                                            |
| <b>66.</b> | ¿Por qué crees que lo hiciste?                                                                                                    |                                            |
| <b>67.</b> | En una escala de 0 a 4, cuando hiciste un gesto suicida, ¿en qué medida lo hiciste para deshacerte de tus sentimientos negativos? | 0 1 2 3 4                                  |
| <b>68.</b> | ¿En qué medida lo hiciste para sentir algo, porque te sentías entumecido o vacío?                                                 | 0 1 2 3 4                                  |
| <b>69.</b> | En qué medida lo hiciste para comunicarte con otra persona o conseguir su atención?                                               | 0 1 2 3 4                                  |
| <b>70.</b> | ¿En qué medida lo hiciste para evitar hacer algo o escapar de algo o alguien?                                                     | 0 1 2 3 4                                  |
| <b>71.</b> | En una escala de 0 a 4, ¿en qué medida los problemas con tu familia te llevaron a hacer un gesto suicida?                         | 0 1 2 3 4                                  |
| <b>72.</b> | ¿En qué medida los problemas con tus amigos te llevaron a hacer un gesto suicida?                                                 | 0 1 2 3 4                                  |
| <b>73.</b> | ¿En qué medida los problemas con tu pareja te llevaron a hacer un gesto suicida?                                                  | 0 1 2 3 4                                  |
| <b>74.</b> | ¿En qué medida los problemas con tus compañeros te llevaron a hacer un gesto suicida?                                             | 0 1 2 3 4                                  |
| <b>75.</b> | ¿En qué medida los problemas en el trabajo o los estudios te llevaron a hacer un gesto suicida?                                   | 0 1 2 3 4                                  |

|                                                  |                                                                                                                                               |                                                                                                                                                                                                                                                                                                                                                                                                                                                                                                                                                                                                                                                                                                                                   |               |                       |                  |                       |                 |                       |                  |                       |                    |                       |             |                       |                      |                       |                                                  |                       |                  |                       |                 |                       |
|--------------------------------------------------|-----------------------------------------------------------------------------------------------------------------------------------------------|-----------------------------------------------------------------------------------------------------------------------------------------------------------------------------------------------------------------------------------------------------------------------------------------------------------------------------------------------------------------------------------------------------------------------------------------------------------------------------------------------------------------------------------------------------------------------------------------------------------------------------------------------------------------------------------------------------------------------------------|---------------|-----------------------|------------------|-----------------------|-----------------|-----------------------|------------------|-----------------------|--------------------|-----------------------|-------------|-----------------------|----------------------|-----------------------|--------------------------------------------------|-----------------------|------------------|-----------------------|-----------------|-----------------------|
| <b>76.</b>                                       | ¿En qué medida tu estado mental te llevó a hacer un gesto suicida?                                                                            | 0 1 2 3 4                                                                                                                                                                                                                                                                                                                                                                                                                                                                                                                                                                                                                                                                                                                         |               |                       |                  |                       |                 |                       |                  |                       |                    |                       |             |                       |                      |                       |                                                  |                       |                  |                       |                 |                       |
| <b>77.</b>                                       | ¿Durante qué porcentaje de tiempo tomaste drogas o alcohol cuando hiciste un gesto suicida?                                                   | 0 1 2 3 4 5 6 7 8 9<br>0 1 2 3 4 5 6 7 8 9<br>0 1 2 3 4 5 6 7 8 9                                                                                                                                                                                                                                                                                                                                                                                                                                                                                                                                                                                                                                                                 |               |                       |                  |                       |                 |                       |                  |                       |                    |                       |             |                       |                      |                       |                                                  |                       |                  |                       |                 |                       |
| <b>78.</b>                                       | Durante cuánto tiempo pensaste en hacer un gesto suicida antes de hacerlo?                                                                    | <table border="1"> <tr><td>1. 0 segundos</td><td><input type="radio"/></td></tr> <tr><td>2. 1-60 segundos</td><td><input type="radio"/></td></tr> <tr><td>3. 2-15 minutos</td><td><input type="radio"/></td></tr> <tr><td>4. 16-60 minutos</td><td><input type="radio"/></td></tr> <tr><td>5. menos de un día</td><td><input type="radio"/></td></tr> <tr><td>6. 1-2 días</td><td><input type="radio"/></td></tr> <tr><td>7. más de dos días o</td><td><input type="radio"/></td></tr> <tr><td>8. amplios periodos (abarca más de 2 respuestas)</td><td><input type="radio"/></td></tr> <tr><td>88. no aplicable</td><td><input type="radio"/></td></tr> <tr><td>99. desconocido</td><td><input type="radio"/></td></tr> </table> | 1. 0 segundos | <input type="radio"/> | 2. 1-60 segundos | <input type="radio"/> | 3. 2-15 minutos | <input type="radio"/> | 4. 16-60 minutos | <input type="radio"/> | 5. menos de un día | <input type="radio"/> | 6. 1-2 días | <input type="radio"/> | 7. más de dos días o | <input type="radio"/> | 8. amplios periodos (abarca más de 2 respuestas) | <input type="radio"/> | 88. no aplicable | <input type="radio"/> | 99. desconocido | <input type="radio"/> |
| 1. 0 segundos                                    | <input type="radio"/>                                                                                                                         |                                                                                                                                                                                                                                                                                                                                                                                                                                                                                                                                                                                                                                                                                                                                   |               |                       |                  |                       |                 |                       |                  |                       |                    |                       |             |                       |                      |                       |                                                  |                       |                  |                       |                 |                       |
| 2. 1-60 segundos                                 | <input type="radio"/>                                                                                                                         |                                                                                                                                                                                                                                                                                                                                                                                                                                                                                                                                                                                                                                                                                                                                   |               |                       |                  |                       |                 |                       |                  |                       |                    |                       |             |                       |                      |                       |                                                  |                       |                  |                       |                 |                       |
| 3. 2-15 minutos                                  | <input type="radio"/>                                                                                                                         |                                                                                                                                                                                                                                                                                                                                                                                                                                                                                                                                                                                                                                                                                                                                   |               |                       |                  |                       |                 |                       |                  |                       |                    |                       |             |                       |                      |                       |                                                  |                       |                  |                       |                 |                       |
| 4. 16-60 minutos                                 | <input type="radio"/>                                                                                                                         |                                                                                                                                                                                                                                                                                                                                                                                                                                                                                                                                                                                                                                                                                                                                   |               |                       |                  |                       |                 |                       |                  |                       |                    |                       |             |                       |                      |                       |                                                  |                       |                  |                       |                 |                       |
| 5. menos de un día                               | <input type="radio"/>                                                                                                                         |                                                                                                                                                                                                                                                                                                                                                                                                                                                                                                                                                                                                                                                                                                                                   |               |                       |                  |                       |                 |                       |                  |                       |                    |                       |             |                       |                      |                       |                                                  |                       |                  |                       |                 |                       |
| 6. 1-2 días                                      | <input type="radio"/>                                                                                                                         |                                                                                                                                                                                                                                                                                                                                                                                                                                                                                                                                                                                                                                                                                                                                   |               |                       |                  |                       |                 |                       |                  |                       |                    |                       |             |                       |                      |                       |                                                  |                       |                  |                       |                 |                       |
| 7. más de dos días o                             | <input type="radio"/>                                                                                                                         |                                                                                                                                                                                                                                                                                                                                                                                                                                                                                                                                                                                                                                                                                                                                   |               |                       |                  |                       |                 |                       |                  |                       |                    |                       |             |                       |                      |                       |                                                  |                       |                  |                       |                 |                       |
| 8. amplios periodos (abarca más de 2 respuestas) | <input type="radio"/>                                                                                                                         |                                                                                                                                                                                                                                                                                                                                                                                                                                                                                                                                                                                                                                                                                                                                   |               |                       |                  |                       |                 |                       |                  |                       |                    |                       |             |                       |                      |                       |                                                  |                       |                  |                       |                 |                       |
| 88. no aplicable                                 | <input type="radio"/>                                                                                                                         |                                                                                                                                                                                                                                                                                                                                                                                                                                                                                                                                                                                                                                                                                                                                   |               |                       |                  |                       |                 |                       |                  |                       |                    |                       |             |                       |                      |                       |                                                  |                       |                  |                       |                 |                       |
| 99. desconocido                                  | <input type="radio"/>                                                                                                                         |                                                                                                                                                                                                                                                                                                                                                                                                                                                                                                                                                                                                                                                                                                                                   |               |                       |                  |                       |                 |                       |                  |                       |                    |                       |             |                       |                      |                       |                                                  |                       |                  |                       |                 |                       |
| <b>79.</b>                                       | Antes de que hicieras un gesto suicida, ¿cuántos amigos tuyos, que tú sepas, habían hecho un gesto suicida?                                   | 0 1 2 3 4 5 6 7 8 9<br>0 1 2 3 4 5 6 7 8 9                                                                                                                                                                                                                                                                                                                                                                                                                                                                                                                                                                                                                                                                                        |               |                       |                  |                       |                 |                       |                  |                       |                    |                       |             |                       |                      |                       |                                                  |                       |                  |                       |                 |                       |
| <b>80.</b>                                       | Desde la primera vez que hiciste un gesto suicida, ¿cuántos amigos tuyos han hecho un gesto suicida?                                          | 0 1 2 3 4 5 6 7 8 9<br>0 1 2 3 4 5 6 7 8 9                                                                                                                                                                                                                                                                                                                                                                                                                                                                                                                                                                                                                                                                                        |               |                       |                  |                       |                 |                       |                  |                       |                    |                       |             |                       |                      |                       |                                                  |                       |                  |                       |                 |                       |
| <b>81.</b>                                       | Antes de que hicieras un gesto suicida, ¿en qué medida influyó en ti el hecho de que tus amigos hubieran hecho un gesto suicida? (escala 0a4) | 0 1 2 3 4                                                                                                                                                                                                                                                                                                                                                                                                                                                                                                                                                                                                                                                                                                                         |               |                       |                  |                       |                 |                       |                  |                       |                    |                       |             |                       |                      |                       |                                                  |                       |                  |                       |                 |                       |
| <b>82.</b>                                       | Desde la primea vez que hiciste un gesto suicida, ¿en qué medida influyó en ti el hecho de que tus amigos hicieran un gesto suicida?          | 0 1 2 3 4                                                                                                                                                                                                                                                                                                                                                                                                                                                                                                                                                                                                                                                                                                                         |               |                       |                  |                       |                 |                       |                  |                       |                    |                       |             |                       |                      |                       |                                                  |                       |                  |                       |                 |                       |
| <b>83.</b>                                       | En una escala de 0 a 4, ¿cuál crees que es la probabilidad de que vuelvas a hacer un gesto suicida en el futuro?                              | 0 1 2 3 4                                                                                                                                                                                                                                                                                                                                                                                                                                                                                                                                                                                                                                                                                                                         |               |                       |                  |                       |                 |                       |                  |                       |                    |                       |             |                       |                      |                       |                                                  |                       |                  |                       |                 |                       |

|  |  |  |
|--|--|--|
|  |  |  |
|--|--|--|

# Intento de suicidio

|                                                         |                                                                                           |                     |                     |                     |  |  |  |  |  |  |  |  |  |
|---------------------------------------------------------|-------------------------------------------------------------------------------------------|---------------------|---------------------|---------------------|--|--|--|--|--|--|--|--|--|
| 84.                                                     | Has hecho alguna vez un intento de suicidio en el que tuvieras alguna intención de morir? | 0) no               |                     | O                   |  |  |  |  |  |  |  |  |  |
|                                                         |                                                                                           | 1) sí               |                     | O                   |  |  |  |  |  |  |  |  |  |
| Llamaremos a este tipo de actos "intentos de suicidio". |                                                                                           |                     |                     |                     |  |  |  |  |  |  |  |  |  |
| 85.                                                     | Cuántos años tenías la primera vez que intentaste matarte?                                | 0 1 2 3 4 5 6 7 8 9 |                     |                     |  |  |  |  |  |  |  |  |  |
|                                                         |                                                                                           | 0 1 2 3 4 5 6 7 8 9 |                     |                     |  |  |  |  |  |  |  |  |  |
| 86.                                                     | ¿Cuándo fue el intento más reciente?                                                      | Día                 | D                   | 0 1 2 3 4 5 6 7 8 9 |  |  |  |  |  |  |  |  |  |
|                                                         |                                                                                           |                     | D'                  | 0 1 2 3 4 5 6 7 8 9 |  |  |  |  |  |  |  |  |  |
|                                                         |                                                                                           | Mes                 | M                   | 0 1 2 3 4 5 6 7 8 9 |  |  |  |  |  |  |  |  |  |
|                                                         |                                                                                           |                     | M'                  | 0 1 2 3 4 5 6 7 8 9 |  |  |  |  |  |  |  |  |  |
|                                                         |                                                                                           | Año                 | A                   | 0 1 2 3 4 5 6 7 8 9 |  |  |  |  |  |  |  |  |  |
|                                                         |                                                                                           |                     | A'                  | 0 1 2 3 4 5 6 7 8 9 |  |  |  |  |  |  |  |  |  |
|                                                         |                                                                                           |                     | A''                 | 0 1 2 3 4 5 6 7 8 9 |  |  |  |  |  |  |  |  |  |
|                                                         |                                                                                           |                     | A'''                | 0 1 2 3 4 5 6 7 8 9 |  |  |  |  |  |  |  |  |  |
| 87.                                                     | ¿Cuántos días han pasado desde entonces?                                                  | 0 1 2 3 4 5 6 7 8 9 |                     |                     |  |  |  |  |  |  |  |  |  |
|                                                         | No aplicable                                                                              | O                   | 0 1 2 3 4 5 6 7 8 9 |                     |  |  |  |  |  |  |  |  |  |
|                                                         | Desconocido                                                                               | O                   | 0 1 2 3 4 5 6 7 8 9 |                     |  |  |  |  |  |  |  |  |  |
| 88.                                                     | ¿Cuántos intentos de suicidio has                                                         | 0 1 2 3 4 5 6 7 8 9 |                     |                     |  |  |  |  |  |  |  |  |  |



|                                                        |                                                                                                                |                                                                                                                                                                                                                                                                                                                                                                                                                                                                                                                                                                                                                                                                                                                                                                                                                                                                                                                                                                                                                                                                                  |                                                        |                       |                                        |                       |                                  |                       |                          |                       |                      |                       |                       |                       |                           |                       |                           |                       |                              |                       |                 |                       |                          |                       |                  |                       |                 |                       |
|--------------------------------------------------------|----------------------------------------------------------------------------------------------------------------|----------------------------------------------------------------------------------------------------------------------------------------------------------------------------------------------------------------------------------------------------------------------------------------------------------------------------------------------------------------------------------------------------------------------------------------------------------------------------------------------------------------------------------------------------------------------------------------------------------------------------------------------------------------------------------------------------------------------------------------------------------------------------------------------------------------------------------------------------------------------------------------------------------------------------------------------------------------------------------------------------------------------------------------------------------------------------------|--------------------------------------------------------|-----------------------|----------------------------------------|-----------------------|----------------------------------|-----------------------|--------------------------|-----------------------|----------------------|-----------------------|-----------------------|-----------------------|---------------------------|-----------------------|---------------------------|-----------------------|------------------------------|-----------------------|-----------------|-----------------------|--------------------------|-----------------------|------------------|-----------------------|-----------------|-----------------------|
|                                                        |                                                                                                                | 99. Desconocido                                                                                                                                                                                                                                                                                                                                                                                                                                                                                                                                                                                                                                                                                                                                                                                                                                                                                                                                                                                                                                                                  | <input type="radio"/>                                  |                       |                                        |                       |                                  |                       |                          |                       |                      |                       |                       |                       |                           |                       |                           |                       |                              |                       |                 |                       |                          |                       |                  |                       |                 |                       |
| <b>93.</b>                                             | ¿Cuáles fueron las circunstancias que contribuyeron a tu intento de suicidio más reciente? (máximo 2 opciones) | <table border="1"> <tr> <td>1. Pérdida de trabajo/estrés laboral/fracaso académico</td> <td><input type="radio"/></td> </tr> <tr> <td>2. Discusiones con familiares o amigos</td> <td><input type="radio"/></td> </tr> <tr> <td>3. Discusión con esposa o pareja</td> <td><input type="radio"/></td> </tr> <tr> <td>4. Problemas financieros</td> <td><input type="radio"/></td> </tr> <tr> <td>5. Desalojo, embargo</td> <td><input type="radio"/></td> </tr> <tr> <td>6. Problemas de salud</td> <td><input type="radio"/></td> </tr> <tr> <td>7. Muerte de otra persona</td> <td><input type="radio"/></td> </tr> <tr> <td>8. Síntomas psiquiátricos</td> <td><input type="radio"/></td> </tr> <tr> <td>9. Acontecimiento humillante</td> <td><input type="radio"/></td> </tr> <tr> <td>10. Otro: _____</td> <td><input type="radio"/></td> </tr> <tr> <td>11. Se niega a contestar</td> <td><input type="radio"/></td> </tr> <tr> <td>88. no aplicable</td> <td><input type="radio"/></td> </tr> <tr> <td>99. desconocido</td> <td><input type="radio"/></td> </tr> </table> | 1. Pérdida de trabajo/estrés laboral/fracaso académico | <input type="radio"/> | 2. Discusiones con familiares o amigos | <input type="radio"/> | 3. Discusión con esposa o pareja | <input type="radio"/> | 4. Problemas financieros | <input type="radio"/> | 5. Desalojo, embargo | <input type="radio"/> | 6. Problemas de salud | <input type="radio"/> | 7. Muerte de otra persona | <input type="radio"/> | 8. Síntomas psiquiátricos | <input type="radio"/> | 9. Acontecimiento humillante | <input type="radio"/> | 10. Otro: _____ | <input type="radio"/> | 11. Se niega a contestar | <input type="radio"/> | 88. no aplicable | <input type="radio"/> | 99. desconocido | <input type="radio"/> |
| 1. Pérdida de trabajo/estrés laboral/fracaso académico | <input type="radio"/>                                                                                          |                                                                                                                                                                                                                                                                                                                                                                                                                                                                                                                                                                                                                                                                                                                                                                                                                                                                                                                                                                                                                                                                                  |                                                        |                       |                                        |                       |                                  |                       |                          |                       |                      |                       |                       |                       |                           |                       |                           |                       |                              |                       |                 |                       |                          |                       |                  |                       |                 |                       |
| 2. Discusiones con familiares o amigos                 | <input type="radio"/>                                                                                          |                                                                                                                                                                                                                                                                                                                                                                                                                                                                                                                                                                                                                                                                                                                                                                                                                                                                                                                                                                                                                                                                                  |                                                        |                       |                                        |                       |                                  |                       |                          |                       |                      |                       |                       |                       |                           |                       |                           |                       |                              |                       |                 |                       |                          |                       |                  |                       |                 |                       |
| 3. Discusión con esposa o pareja                       | <input type="radio"/>                                                                                          |                                                                                                                                                                                                                                                                                                                                                                                                                                                                                                                                                                                                                                                                                                                                                                                                                                                                                                                                                                                                                                                                                  |                                                        |                       |                                        |                       |                                  |                       |                          |                       |                      |                       |                       |                       |                           |                       |                           |                       |                              |                       |                 |                       |                          |                       |                  |                       |                 |                       |
| 4. Problemas financieros                               | <input type="radio"/>                                                                                          |                                                                                                                                                                                                                                                                                                                                                                                                                                                                                                                                                                                                                                                                                                                                                                                                                                                                                                                                                                                                                                                                                  |                                                        |                       |                                        |                       |                                  |                       |                          |                       |                      |                       |                       |                       |                           |                       |                           |                       |                              |                       |                 |                       |                          |                       |                  |                       |                 |                       |
| 5. Desalojo, embargo                                   | <input type="radio"/>                                                                                          |                                                                                                                                                                                                                                                                                                                                                                                                                                                                                                                                                                                                                                                                                                                                                                                                                                                                                                                                                                                                                                                                                  |                                                        |                       |                                        |                       |                                  |                       |                          |                       |                      |                       |                       |                       |                           |                       |                           |                       |                              |                       |                 |                       |                          |                       |                  |                       |                 |                       |
| 6. Problemas de salud                                  | <input type="radio"/>                                                                                          |                                                                                                                                                                                                                                                                                                                                                                                                                                                                                                                                                                                                                                                                                                                                                                                                                                                                                                                                                                                                                                                                                  |                                                        |                       |                                        |                       |                                  |                       |                          |                       |                      |                       |                       |                       |                           |                       |                           |                       |                              |                       |                 |                       |                          |                       |                  |                       |                 |                       |
| 7. Muerte de otra persona                              | <input type="radio"/>                                                                                          |                                                                                                                                                                                                                                                                                                                                                                                                                                                                                                                                                                                                                                                                                                                                                                                                                                                                                                                                                                                                                                                                                  |                                                        |                       |                                        |                       |                                  |                       |                          |                       |                      |                       |                       |                       |                           |                       |                           |                       |                              |                       |                 |                       |                          |                       |                  |                       |                 |                       |
| 8. Síntomas psiquiátricos                              | <input type="radio"/>                                                                                          |                                                                                                                                                                                                                                                                                                                                                                                                                                                                                                                                                                                                                                                                                                                                                                                                                                                                                                                                                                                                                                                                                  |                                                        |                       |                                        |                       |                                  |                       |                          |                       |                      |                       |                       |                       |                           |                       |                           |                       |                              |                       |                 |                       |                          |                       |                  |                       |                 |                       |
| 9. Acontecimiento humillante                           | <input type="radio"/>                                                                                          |                                                                                                                                                                                                                                                                                                                                                                                                                                                                                                                                                                                                                                                                                                                                                                                                                                                                                                                                                                                                                                                                                  |                                                        |                       |                                        |                       |                                  |                       |                          |                       |                      |                       |                       |                       |                           |                       |                           |                       |                              |                       |                 |                       |                          |                       |                  |                       |                 |                       |
| 10. Otro: _____                                        | <input type="radio"/>                                                                                          |                                                                                                                                                                                                                                                                                                                                                                                                                                                                                                                                                                                                                                                                                                                                                                                                                                                                                                                                                                                                                                                                                  |                                                        |                       |                                        |                       |                                  |                       |                          |                       |                      |                       |                       |                       |                           |                       |                           |                       |                              |                       |                 |                       |                          |                       |                  |                       |                 |                       |
| 11. Se niega a contestar                               | <input type="radio"/>                                                                                          |                                                                                                                                                                                                                                                                                                                                                                                                                                                                                                                                                                                                                                                                                                                                                                                                                                                                                                                                                                                                                                                                                  |                                                        |                       |                                        |                       |                                  |                       |                          |                       |                      |                       |                       |                       |                           |                       |                           |                       |                              |                       |                 |                       |                          |                       |                  |                       |                 |                       |
| 88. no aplicable                                       | <input type="radio"/>                                                                                          |                                                                                                                                                                                                                                                                                                                                                                                                                                                                                                                                                                                                                                                                                                                                                                                                                                                                                                                                                                                                                                                                                  |                                                        |                       |                                        |                       |                                  |                       |                          |                       |                      |                       |                       |                       |                           |                       |                           |                       |                              |                       |                 |                       |                          |                       |                  |                       |                 |                       |
| 99. desconocido                                        | <input type="radio"/>                                                                                          |                                                                                                                                                                                                                                                                                                                                                                                                                                                                                                                                                                                                                                                                                                                                                                                                                                                                                                                                                                                                                                                                                  |                                                        |                       |                                        |                       |                                  |                       |                          |                       |                      |                       |                       |                       |                           |                       |                           |                       |                              |                       |                 |                       |                          |                       |                  |                       |                 |                       |
| <b>94.</b>                                             | ¿Qué clase de lesiones sufriste como consecuencia del intento?                                                 |                                                                                                                                                                                                                                                                                                                                                                                                                                                                                                                                                                                                                                                                                                                                                                                                                                                                                                                                                                                                                                                                                  |                                                        |                       |                                        |                       |                                  |                       |                          |                       |                      |                       |                       |                       |                           |                       |                           |                       |                              |                       |                 |                       |                          |                       |                  |                       |                 |                       |
| En relación al intento de suicidio más letal:          |                                                                                                                |                                                                                                                                                                                                                                                                                                                                                                                                                                                                                                                                                                                                                                                                                                                                                                                                                                                                                                                                                                                                                                                                                  |                                                        |                       |                                        |                       |                                  |                       |                          |                       |                      |                       |                       |                       |                           |                       |                           |                       |                              |                       |                 |                       |                          |                       |                  |                       |                 |                       |

|     |                                                                                                    |                                                                                                                                                                                                                                  |                                                                                                                                                                                      |
|-----|----------------------------------------------------------------------------------------------------|----------------------------------------------------------------------------------------------------------------------------------------------------------------------------------------------------------------------------------|--------------------------------------------------------------------------------------------------------------------------------------------------------------------------------------|
| 95. | ¿Cuándo ocurrió?                                                                                   | Día<br>D<br>D'<br>Mes<br>M<br>M'<br>Año<br>A<br>A'<br>A''<br>A'''                                                                                                                                                                | 0 1 2 3 4 5 6 7 8 9<br>0 1 2 3 4 5 6 7 8 9<br>0 1 2 3 4 5 6 7 8 9<br>0 1 2 3 4 5 6 7 8 9<br>0 1 2 3 4 5 6 7 8 9<br>0 1 2 3 4 5 6 7 8 9<br>0 1 2 3 4 5 6 7 8 9<br>0 1 2 3 4 5 6 7 8 9 |
| 96. | ¿Qué clase de lesiones sufriste como consecuencia del intento?                                     |                                                                                                                                                                                                                                  |                                                                                                                                                                                      |
| 97. | ¿Durante cuánto tiempo pensaste en el suicidio antes del intento?                                  | 1. 0 segundos<br>2. 1-60 segundos<br>3. 2-15 minutos<br>4. 16-60 minutos<br>5. menos de un día<br>6. 1-2 días<br>7. más de dos días o<br>8. amplios periodos (abarca más de 2 respuestas)<br>88. no aplicable<br>99. desconocido | O<br>O<br>O<br>O<br>O<br>O<br>O<br>O<br>O<br>O                                                                                                                                       |
| 98. | ¿Por qué crees que intentaste suicidarte?                                                          |                                                                                                                                                                                                                                  |                                                                                                                                                                                      |
| 99. | En una escala de 0 a 4, cuando intentaste suicidarte, ¿en qué medida lo hiciste para deshacerte de | 0 1 2 3 4                                                                                                                                                                                                                        |                                                                                                                                                                                      |

|             |                                                                                                         |                                                                   |
|-------------|---------------------------------------------------------------------------------------------------------|-------------------------------------------------------------------|
|             | tus sentimientos negativos?                                                                             |                                                                   |
| <b>100.</b> | ¿En qué medida lo hiciste para sentir algo, porque te sentías entumecido o vacío?                       | 0 1 2 3 4                                                         |
| <b>101.</b> | ¿En qué medida lo hiciste para comunicarte con alguien o conseguir su atención?                         | 0 1 2 3 4                                                         |
| <b>102.</b> | ¿En qué medida lo hiciste para evadir algo o escapar de algo o alguien?                                 | 0 1 2 3 4                                                         |
| <b>103.</b> | En una escala de 0 a 4, ¿en qué medida los problemas con tu familia te llevaron a intentar suicidarte?  | 0 1 2 3 4                                                         |
| <b>104.</b> | ¿En qué medida los problemas con tus amigos te llevaron a intentar suicidarte?                          | 0 1 2 3 4                                                         |
| <b>105.</b> | ¿En qué medida los problemas con tu pareja te llevaron a intentar suicidarte?                           | 0 1 2 3 4                                                         |
| <b>106.</b> | ¿En qué medida los problemas con tus compañeros te llevaron a intentar suicidarte?                      | 0 1 2 3 4                                                         |
| <b>107.</b> | ¿En qué medida los problemas en el trabajo o los estudios te llevaron a intentar suicidarte?            | 0 1 2 3 4                                                         |
| <b>108.</b> | ¿En qué medida tu estado mental te llevó a intentar suicidarte?                                         | 0 1 2 3 4                                                         |
| <b>109.</b> | En una escala de 0 a 4, ¿cuánto dolor estabas experimentando cuando hiciste el intento de suicidio?     | 0 1 2 3 4                                                         |
| <b>110.</b> | ¿Durante qué porcentaje de tiempo estuviste tomando drogas o alcohol cuando intentaste suicidarte?      | 0 1 2 3 4 5 6 7 8 9<br>0 1 2 3 4 5 6 7 8 9<br>0 1 2 3 4 5 6 7 8 9 |
| <b>111.</b> | Antes del primer intento de suicidio, ¿cuántos amigos tuyos, que tú sepas, habían intentado suicidarse? | 0 1 2 3 4 5 6 7 8 9<br>0 1 2 3 4 5 6 7 8 9                        |
| <b>112.</b> | Desde que intentaste suicidarte por primera vez, ¿cuántos amigos tuyos han intentado suicidarse?        | 0 1 2 3 4 5 6 7 8 9<br>0 1 2 3 4 5 6 7 8 9                        |

|             |                                                                                                                                                       |                   |
|-------------|-------------------------------------------------------------------------------------------------------------------------------------------------------|-------------------|
| <b>113.</b> | Antes del primer intento de suicidio, ¿en qué medida el hecho de que alguno de tus amigos intentara suicidarte te influyó? (Escala 0 a 4).            | 0   1   2   3   4 |
| <b>114.</b> | Desde que intentaste suicidarte por primera vez, ¿en qué medida el hecho de que alguno de tus amigos intentara suicidarte te influyó? (Escala 0 a 4). | 0   1   2   3   4 |
| <b>115.</b> | En una escala de 0 a 4, ¿cuál crees que es la probabilidad de que vuelvas a intentar suicidarte?                                                      | 0   1   2   3   4 |

## Pensamientos relacionados con las autolesiones

|                                                 |                                                                                                                        |                                       |  |  |  |  |  |  |  |  |  |   |
|-------------------------------------------------|------------------------------------------------------------------------------------------------------------------------|---------------------------------------|--|--|--|--|--|--|--|--|--|---|
| 116.                                            | ¿Alguna vez has pensado en hacerte daño a ti mismo sin tener intención de morir? (p.e., cortarte o hacerte quemaduras) | 0) no                                 |  |  |  |  |  |  |  |  |  | O |
|                                                 |                                                                                                                        | 1) sí                                 |  |  |  |  |  |  |  |  |  | O |
| Llamaremos a este tipo de actos “autolesiones”. |                                                                                                                        |                                       |  |  |  |  |  |  |  |  |  |   |
| 117.                                            | ¿Cuántos años tenías la primera vez que lo hiciste? ( <i>edad</i> )                                                    | 0   1   2   3   4   5   6   7   8   9 |  |  |  |  |  |  |  |  |  |   |
|                                                 |                                                                                                                        | 0   1   2   3   4   5   6   7   8   9 |  |  |  |  |  |  |  |  |  |   |
| 118.                                            | ¿Cuántos años tenías la última vez? ( <i>edad</i> )                                                                    | 0   1   2   3   4   5   6   7   8   9 |  |  |  |  |  |  |  |  |  |   |
|                                                 |                                                                                                                        | 0   1   2   3   4   5   6   7   8   9 |  |  |  |  |  |  |  |  |  |   |
| 119.                                            | Cuántas veces en tu vida has tenido este tipo de pensamientos? (episodios separados)                                   | 0   1   2   3   4   5   6   7   8   9 |  |  |  |  |  |  |  |  |  |   |
|                                                 |                                                                                                                        | 0   1   2   3   4   5   6   7   8   9 |  |  |  |  |  |  |  |  |  |   |
| 120.                                            | ¿Cuántas veces en el pasado año?                                                                                       | 0   1   2   3   4   5   6   7   8   9 |  |  |  |  |  |  |  |  |  |   |
|                                                 |                                                                                                                        | 0   1   2   3   4   5   6   7   8   9 |  |  |  |  |  |  |  |  |  |   |
| 121.                                            | ¿Cuántas veces en el pasado mes?                                                                                       | 0   1   2   3   4   5   6   7   8   9 |  |  |  |  |  |  |  |  |  |   |
|                                                 |                                                                                                                        | 0   1   2   3   4   5   6   7   8   9 |  |  |  |  |  |  |  |  |  |   |
| 122.                                            | ¿Cuántas veces en la semana                                                                                            | 0   1   2   3   4   5   6   7   8   9 |  |  |  |  |  |  |  |  |  |   |



|             |                                                                                                                    |                     |
|-------------|--------------------------------------------------------------------------------------------------------------------|---------------------|
|             | pasada?                                                                                                            | 0 1 2 3 4 5 6 7 8 9 |
| <b>123.</b> | En una escala de 0 a 4, en el peor momento, ¿qué intensidad tenían tus pensamientos de hacerte daño?               | 0 1 2 3 4           |
| <b>124.</b> | Por término medio, ¿qué intensidad tenían estos pensamientos?                                                      | 0 1 2 3 4           |
| <b>125.</b> | ¿Por qué crees que tienes este tipo de pensamientos?                                                               |                     |
| <b>126.</b> | En una escala de 0 a 4, ¿en qué medida tenías estos pensamientos para deshacerte de sentimientos negativos?        | 0 1 2 3 4           |
| <b>127.</b> | ¿En qué medida los tenías para sentir algo, porque te sentías entumecido o vacío?                                  | 0 1 2 3 4           |
| <b>128.</b> | ¿En qué medida los tenías para comunicarte con alguien o conseguir su atención?                                    | 0 1 2 3 4           |
| <b>129.</b> | ¿En qué medida tenías estos pensamientos para evitar hacer algo o escapar de algo o alguien?                       | 0 1 2 3 4           |
| <b>130.</b> | En una escala de 0 a 4, ¿en qué medida los problemas con tu familia te llevaron a tener este tipo de pensamientos? | 0 1 2 3 4           |
| <b>131.</b> | ¿En qué medida los problemas con tus amigos te llevaron a tener estos pensamientos?                                | 0 1 2 3 4           |
| <b>132.</b> | ¿En qué medida los problemas con tu pareja te llevaron a tener estos pensamientos?                                 | 0 1 2 3 4           |
| <b>133.</b> | ¿En qué medida los problemas con tus compañeros te llevaron a tener estos pensamientos?                            | 0 1 2 3 4           |
| <b>134.</b> | ¿En qué medida los problemas en el trabajo o los estudios te llevaron a tener estos pensamientos?                  | 0 1 2 3 4           |

|             |                                                                                                                                                |                                                                                                                                                                                                                                                                                                                                                                                                                                                              |
|-------------|------------------------------------------------------------------------------------------------------------------------------------------------|--------------------------------------------------------------------------------------------------------------------------------------------------------------------------------------------------------------------------------------------------------------------------------------------------------------------------------------------------------------------------------------------------------------------------------------------------------------|
| <b>135.</b> | ¿En qué medida tu estado mental te llevó a tener estos pensamientos?                                                                           | 0 1 2 3 4                                                                                                                                                                                                                                                                                                                                                                                                                                                    |
| <b>136.</b> | Cuando tuviste estos pensamientos, ¿durante qué porcentaje del tiempo estuviste tomando drogas o alcohol?                                      | 0 1 2 3 4 5 6 7 8 9<br>0 1 2 3 4 5 6 7 8 9<br>0 1 2 3 4 5 6 7 8 9                                                                                                                                                                                                                                                                                                                                                                                            |
| <b>137.</b> | Cuando tuviste estos pensamientos, ¿cuánto tiempo solían durar?                                                                                | 1. 0 segundos <input type="radio"/><br>2. 1-60 segundos <input type="radio"/><br>3. 2-15 minutos <input type="radio"/><br>4. 16-60 minutos <input type="radio"/><br>5. menos de un día <input type="radio"/><br>6. 1-2 días <input type="radio"/><br>7. más de dos días o <input type="radio"/><br>8. amplios periodos (abarca más de 2 respuestas) <input type="radio"/><br>88. no aplicable <input type="radio"/><br>99. desconocido <input type="radio"/> |
| <b>138.</b> | Antes de que pensaras en hacerte daño por primera vez, ¿cuántos amigos tuyos, que tú sepas, habían tenido este tipo de pensamientos?           | 0 1 2 3 4 5 6 7 8 9<br>0 1 2 3 4 5 6 7 8 9                                                                                                                                                                                                                                                                                                                                                                                                                   |
| <b>139.</b> | Desde la primera vez que tuviste estos pensamientos, ¿cuántos de tus amigos han pensado en hacerse daño?                                       | 0 1 2 3 4 5 6 7 8 9<br>0 1 2 3 4 5 6 7 8 9                                                                                                                                                                                                                                                                                                                                                                                                                   |
| <b>140.</b> | Antes de que tuvieras estos pensamientos, ¿en qué medida influyó en ti el hecho de que tus amigos pensarán en hacerse daño? (Escala de 0 a 4). | 0 1 2 3 4                                                                                                                                                                                                                                                                                                                                                                                                                                                    |
| <b>141.</b> | Desde la primera vez que tuviste estos pensamientos, ¿en qué medida influyó el ti el hecho de que tus amigos pensarán en hacerse daño?         | 0 1 2 3 4                                                                                                                                                                                                                                                                                                                                                                                                                                                    |
| <b>142.</b> | En una escala de 0 a 4, ¿cuál es la probabilidad de que tengas este tipo                                                                       | 0 1 2 3 4                                                                                                                                                                                                                                                                                                                                                                                                                                                    |

|  |                               |  |
|--|-------------------------------|--|
|  | de pensamientos en el futuro? |  |
|--|-------------------------------|--|

## Autolesiones

|      |                                                                                                                                                                                                                                                                         |                     |   |
|------|-------------------------------------------------------------------------------------------------------------------------------------------------------------------------------------------------------------------------------------------------------------------------|---------------------|---|
| 143. | ¿Alguna vez te has autolesionado?                                                                                                                                                                                                                                       | 0) no               | O |
|      |                                                                                                                                                                                                                                                                         | 1) sí               | O |
| 144. | ¿Cuántos años tenías la primera vez? ( <i>edad</i> )                                                                                                                                                                                                                    | 0 1 2 3 4 5 6 7 8 9 |   |
|      |                                                                                                                                                                                                                                                                         | 0 1 2 3 4 5 6 7 8 9 |   |
| 145. | ¿Cuántos años tenías la última vez?                                                                                                                                                                                                                                     | 0 1 2 3 4 5 6 7 8 9 |   |
|      |                                                                                                                                                                                                                                                                         | 0 1 2 3 4 5 6 7 8 9 |   |
| 146. | ¿Cuántas veces en tu vida te has autolesionado? (Episodios separados)                                                                                                                                                                                                   | 0 1 2 3 4 5 6 7 8 9 |   |
|      |                                                                                                                                                                                                                                                                         | 0 1 2 3 4 5 6 7 8 9 |   |
| 147. | ¿Cuántas veces en el último año?                                                                                                                                                                                                                                        | 0 1 2 3 4 5 6 7 8 9 |   |
|      |                                                                                                                                                                                                                                                                         | 0 1 2 3 4 5 6 7 8 9 |   |
| 148. | ¿Cuántas veces en el pasado mes?                                                                                                                                                                                                                                        | 0 1 2 3 4 5 6 7 8 9 |   |
|      |                                                                                                                                                                                                                                                                         | 0 1 2 3 4 5 6 7 8 9 |   |
| 149. | ¿Cuántas veces en la pasada semana?                                                                                                                                                                                                                                     | 0 1 2 3 4 5 6 7 8 9 |   |
|      |                                                                                                                                                                                                                                                                         | 0 1 2 3 4 5 6 7 8 9 |   |
| 150. | Ahora te voy a decir una serie de métodos que la gente utiliza para hacerse daño. Dime, ¿cuáles de estos métodos has utilizado? ( <i>Escoge 5 de los métodos que aparecen a continuación</i> )                                                                          | 0 1 2 3 4 5 6 7 8 9 |   |
|      |                                                                                                                                                                                                                                                                         | 0 1 2 3 4 5 6 7 8 9 |   |
|      | 1. Hacerte cortes<br>2. Golpeararte a propósito<br>3. Arrancarte el pelo<br>4. Hacerte un tatuaje a ti mismo<br>5. Hurgar en una herida<br>6. Quemarte la piel (ej. con un cigarro, cerilla u otro objeto caliente)<br>7. Insertar objetos bajo las uñas o bajo la piel | 0 1 2 3 4 5 6 7 8 9 |   |

|                  |                                                                                                                                                                                                                                                                     |                                                                                                                                                                                                                                                                              |       |                       |       |                       |                  |                       |                 |                       |
|------------------|---------------------------------------------------------------------------------------------------------------------------------------------------------------------------------------------------------------------------------------------------------------------|------------------------------------------------------------------------------------------------------------------------------------------------------------------------------------------------------------------------------------------------------------------------------|-------|-----------------------|-------|-----------------------|------------------|-----------------------|-----------------|-----------------------|
|                  | 8. Morderte (ej. Morderte los labios)<br>9. Pellizcarte zonas del cuerpo hasta el punto de hacerte sangre<br>10. Hacerte arañazos<br>11. Frotarte la piel hasta el punto de hacerte sangre.<br>12. Otro (especificar): _____<br>88. No aplicable<br>99. Desconocido | 0 1 2 3 4 5 6 7 8 9<br><br>0 1 2 3 4 5 6 7 8 9                                                                                                                                                                                                                               |       |                       |       |                       |                  |                       |                 |                       |
|                  |                                                                                                                                                                                                                                                                     |                                                                                                                                                                                                                                                                              |       |                       |       |                       |                  |                       |                 |                       |
|                  |                                                                                                                                                                                                                                                                     | 0 1 2 3 4 5 6 7 8 9<br><br>0 1 2 3 4 5 6 7 8 9                                                                                                                                                                                                                               |       |                       |       |                       |                  |                       |                 |                       |
| <b>151.</b>      | ¿Alguna vez has recibido tratamiento medico por las heridas que te causaste?                                                                                                                                                                                        | <table border="1"> <tr> <td>0) no</td><td><input type="radio"/></td></tr> <tr> <td>1) sí</td><td><input type="radio"/></td></tr> <tr> <td>88) no aplicable</td><td><input type="radio"/></td></tr> <tr> <td>99) desconocido</td><td><input type="radio"/></td></tr> </table> | 0) no | <input type="radio"/> | 1) sí | <input type="radio"/> | 88) no aplicable | <input type="radio"/> | 99) desconocido | <input type="radio"/> |
| 0) no            | <input type="radio"/>                                                                                                                                                                                                                                               |                                                                                                                                                                                                                                                                              |       |                       |       |                       |                  |                       |                 |                       |
| 1) sí            | <input type="radio"/>                                                                                                                                                                                                                                               |                                                                                                                                                                                                                                                                              |       |                       |       |                       |                  |                       |                 |                       |
| 88) no aplicable | <input type="radio"/>                                                                                                                                                                                                                                               |                                                                                                                                                                                                                                                                              |       |                       |       |                       |                  |                       |                 |                       |
| 99) desconocido  | <input type="radio"/>                                                                                                                                                                                                                                               |                                                                                                                                                                                                                                                                              |       |                       |       |                       |                  |                       |                 |                       |
| <b>152.</b>      | ¿Por qué crees que te haces daño?                                                                                                                                                                                                                                   |                                                                                                                                                                                                                                                                              |       |                       |       |                       |                  |                       |                 |                       |
| <b>153.</b>      | En una escala de 0 a 4, cuando te hacías daño, ¿en qué medida lo hacías para deshacerte de los malos sentimientos?                                                                                                                                                  | 0 1 2 3 4                                                                                                                                                                                                                                                                    |       |                       |       |                       |                  |                       |                 |                       |
| <b>154.</b>      | ¿En qué medida lo hacías para sentir algo, porque te sentías entumecido o vacío?                                                                                                                                                                                    | 0 1 2 3 4                                                                                                                                                                                                                                                                    |       |                       |       |                       |                  |                       |                 |                       |
| <b>155.</b>      | ¿En qué medida lo hacías para comunicarte con alguien o conseguir su atención?                                                                                                                                                                                      | 0 1 2 3 4                                                                                                                                                                                                                                                                    |       |                       |       |                       |                  |                       |                 |                       |
| <b>156.</b>      | ¿En qué medida lo hacías para evitar hacer algo o escapar de algo o de alguien?                                                                                                                                                                                     | 0 1 2 3 4                                                                                                                                                                                                                                                                    |       |                       |       |                       |                  |                       |                 |                       |
| <b>157.</b>      | En una escala de 0 a 4, ¿en qué medida los problemas con tu familia te llevaron a autolesionarte?                                                                                                                                                                   | 0 1 2 3 4                                                                                                                                                                                                                                                                    |       |                       |       |                       |                  |                       |                 |                       |
| <b>158.</b>      | ¿En qué medida los problemas con tus amigos te llevaron a                                                                                                                                                                                                           | 0 1 2 3 4                                                                                                                                                                                                                                                                    |       |                       |       |                       |                  |                       |                 |                       |

|             |                                                                                            |                                                                                                                         |                       |
|-------------|--------------------------------------------------------------------------------------------|-------------------------------------------------------------------------------------------------------------------------|-----------------------|
|             | autolesionarte?                                                                            |                                                                                                                         |                       |
| <b>159.</b> | ¿En qué medida los problemas con tu pareja te llevaron a autolesionarte?                   | 0   1   2   3   4                                                                                                       |                       |
| <b>160.</b> | ¿En qué medida los problemas con tus compañeros te llevaron a autolesionarte?              | 0   1   2   3   4                                                                                                       |                       |
| <b>161.</b> | ¿En qué medida los problemas en el trabajo o los estudios te llevaron a autolesionarte?    | 0   1   2   3   4                                                                                                       |                       |
| <b>162.</b> | ¿En qué medida tu estado mental te llevó a autolesionarte?                                 | 0   1   2   3   4                                                                                                       |                       |
| <b>163.</b> | ¿Durante cuánto tiempo (en %) estuviste tomando drogas o alcohol cuando te autolesionaste? | 0   1   2   3   4   5   6   7   8   9<br>0   1   2   3   4   5   6   7   8   9<br>0   1   2   3   4   5   6   7   8   9 |                       |
| <b>164.</b> | ¿Durante cuánto tiempo pensaste en autolesionarte antes de hacerlo?                        | 1. 0 segundos                                                                                                           | <input type="radio"/> |
|             |                                                                                            | 2. 1-60 segundos                                                                                                        | <input type="radio"/> |
|             |                                                                                            | 3. 2-15 minutos                                                                                                         | <input type="radio"/> |
|             |                                                                                            | 4. 16-60 minutos                                                                                                        | <input type="radio"/> |
|             |                                                                                            | 5. menos de un día                                                                                                      | <input type="radio"/> |
|             |                                                                                            | 6. 1-2 días                                                                                                             | <input type="radio"/> |

|      |                                                                                                                                        |                                                  |   |
|------|----------------------------------------------------------------------------------------------------------------------------------------|--------------------------------------------------|---|
|      |                                                                                                                                        | 7. más de dos días o                             | O |
|      |                                                                                                                                        | 8. amplios periodos (abarca más de 2 respuestas) | O |
|      |                                                                                                                                        | 88. no aplicable                                 | O |
|      |                                                                                                                                        | 99. desconocido                                  | O |
| 165. | Antes de autolesionarte, ¿cuántos amigos tuyos, que tú sepas, se autolesionaron?                                                       | 0 1 2 3 4 5 6 7 8 9<br>0 1 2 3 4 5 6 7 8 9       |   |
| 166. | Desde la primera vez que te autolesionaste, ¿cuántos de tus amigos se han autolesionado alguna vez?                                    | 0 1 2 3 4 5 6 7 8 9<br>0 1 2 3 4 5 6 7 8 9       |   |
| 167. | Antes de autolesionarte, ¿en qué medida te influyó el hecho de que tus amigos se autolesionaran? (escala de 0 a 4).                    | 0 1 2 3 4                                        |   |
| 168. | Desde la primera vez que te autolesionaste, ¿en qué medida te influyó el hecho de que tus amigos se autolesionaran? (escala de 0 a 4). | 0 1 2 3 4                                        |   |
| 169. | En una escala de 0 a 4, ¿cuál es la probabilidad de que realices este tipo de conductas en el futuro?                                  | 0 1 2 3 4                                        |   |
